# Supplementary material
Source: Springer Nature journal article supplement (https://www.springermedizin.de/resource/supplementary/12916_2010_368_MOESM8_ESM.pdf/9599804)

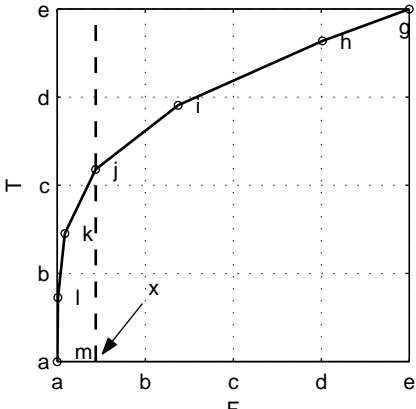

Supplement: MOESM8 [file 9599804]
